# Supplementary material
Source: PubMed Central journal article supplement (PMC10973756)
Supplement: 262_2020_2654_MOESM2_ESM.pdf [file 262_2020_2654_MOESM2_ESM.pdf]

**Supplemental Figure 2**

**A**

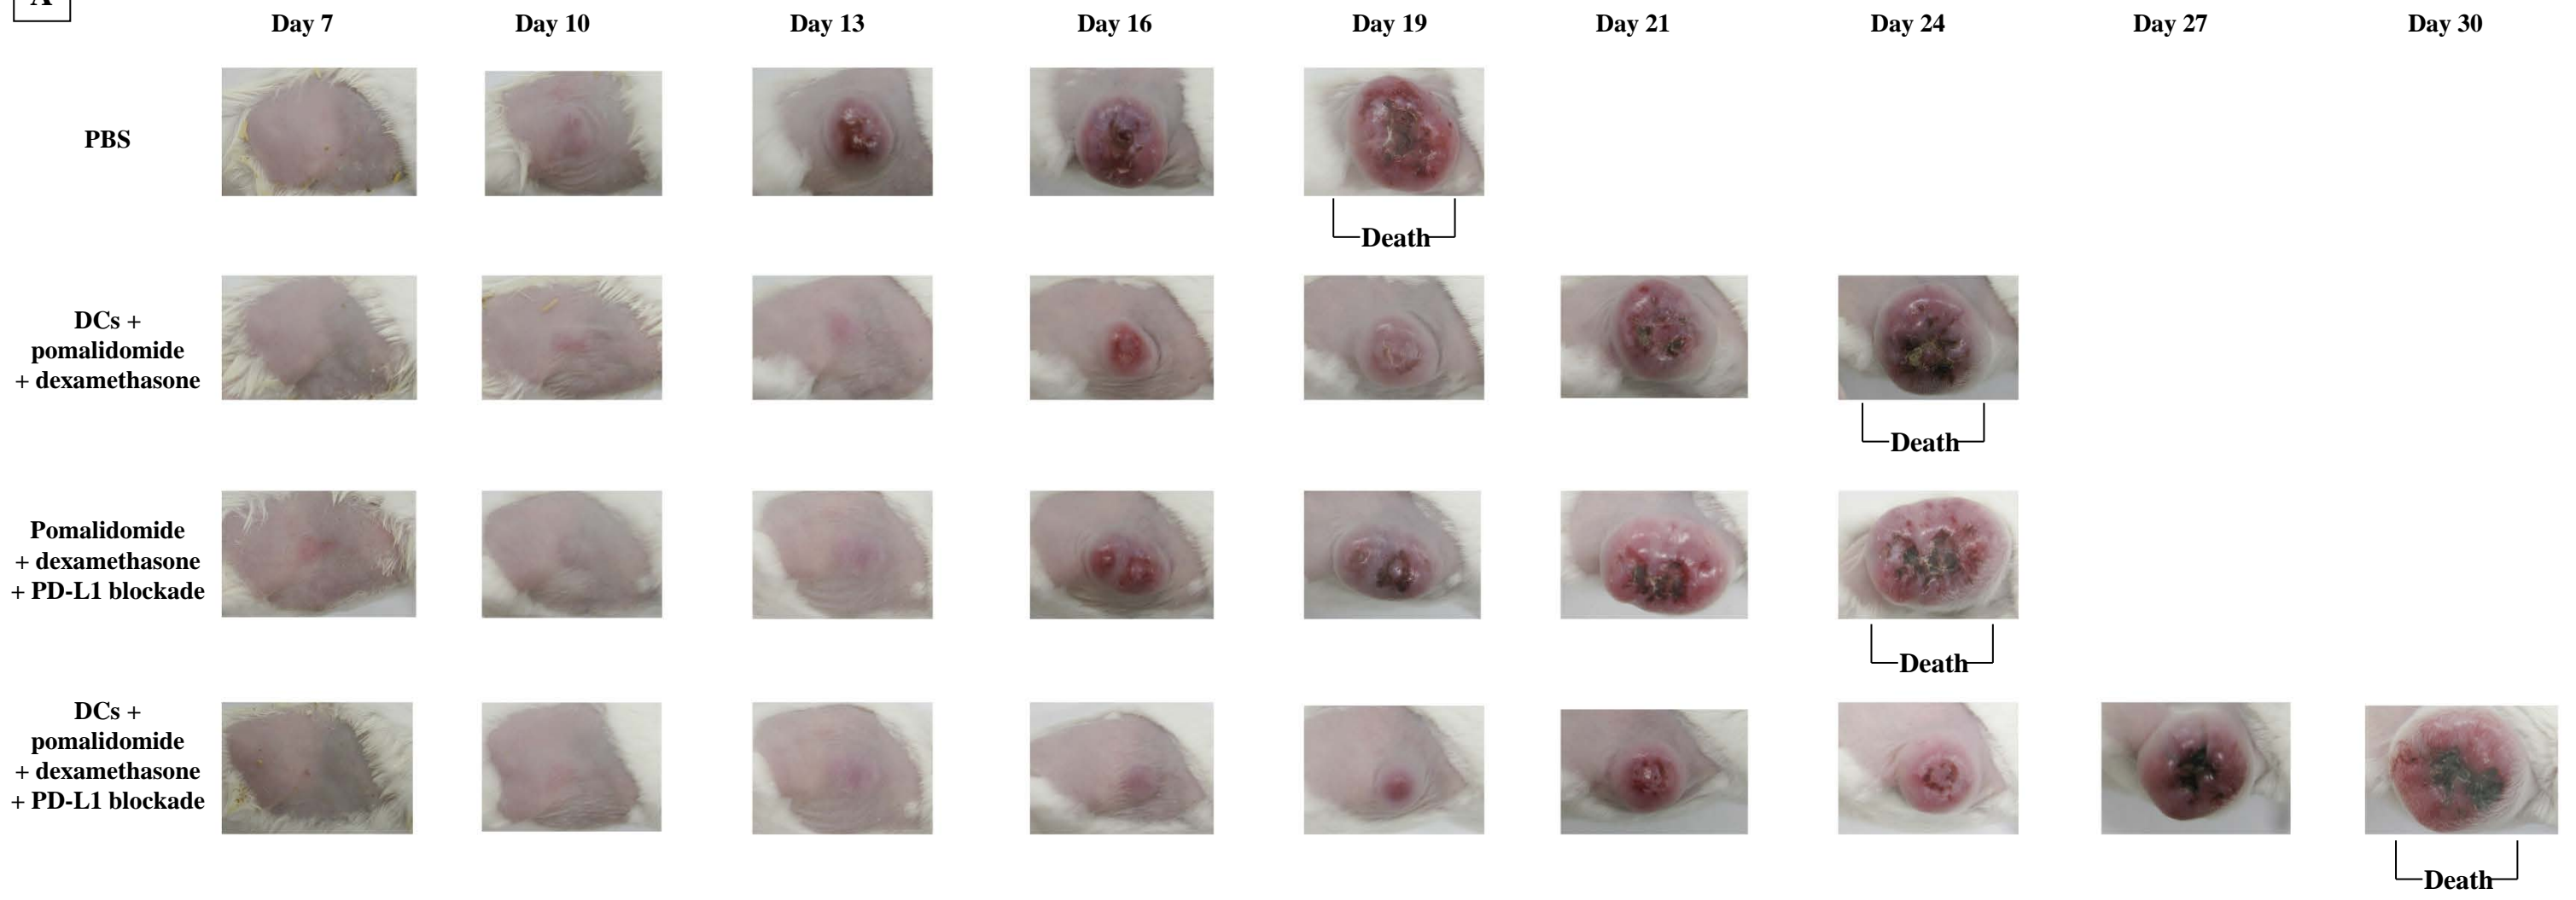

**B**

| Group/Day                                                                                               | Day 13 | Day 16 | Day 19 | Day 21 | Day 24 | Day 27 |
|---------------------------------------------------------------------------------------------------------|--------|--------|--------|--------|--------|--------|
| PBS vs<br>DCs + pomalidomide + dexamethasone                                                            | ns     | ****   | ****   | **     |        |        |
| PBS vs<br>Pomalidomide + dexamethasone + PD-L1 blockade                                                 | ns     | ****   | ****   | ***    |        |        |
| PBS vs<br>DCs + pomalidomide + dexamethasone + PD-L1 blockade                                           | ns     | ****   | ****   | ****   |        |        |
| DCs + pomalidomide + dexamethasone vs<br>Pomalidomide + dexamethasone + PD-L1 blockade                  | ns     | ns     | ns     | ns     | ns     | ns     |
| DCs + pomalidomide + dexamethasone vs<br>DCs + pomalidomide + dexamethasone + PD-L1 blockade            | ns     | ns     | ns     | ns     | *      | **     |
| Pomalidomide + dexamethasone + PD-L1 blockade vs<br>DCs + pomalidomide + dexamethasone + PD-L1 blockade | ns     | ns     | ns     | ns     | *      | **     |

The statistical analysis using Ordinary One-way ANOVA analysis, multiple comparisons using Turkey test.  
P value as follow: \*, P < 0.05; \*\*, P < 0.01; \*\*\*, P < 0.001; \*\*\*\*, P < 0.0001  
ns: no significant.
