# Supplementary material
Source: PubMed Central journal article supplement (PMC10973756)

**Supplemental Figure 1**

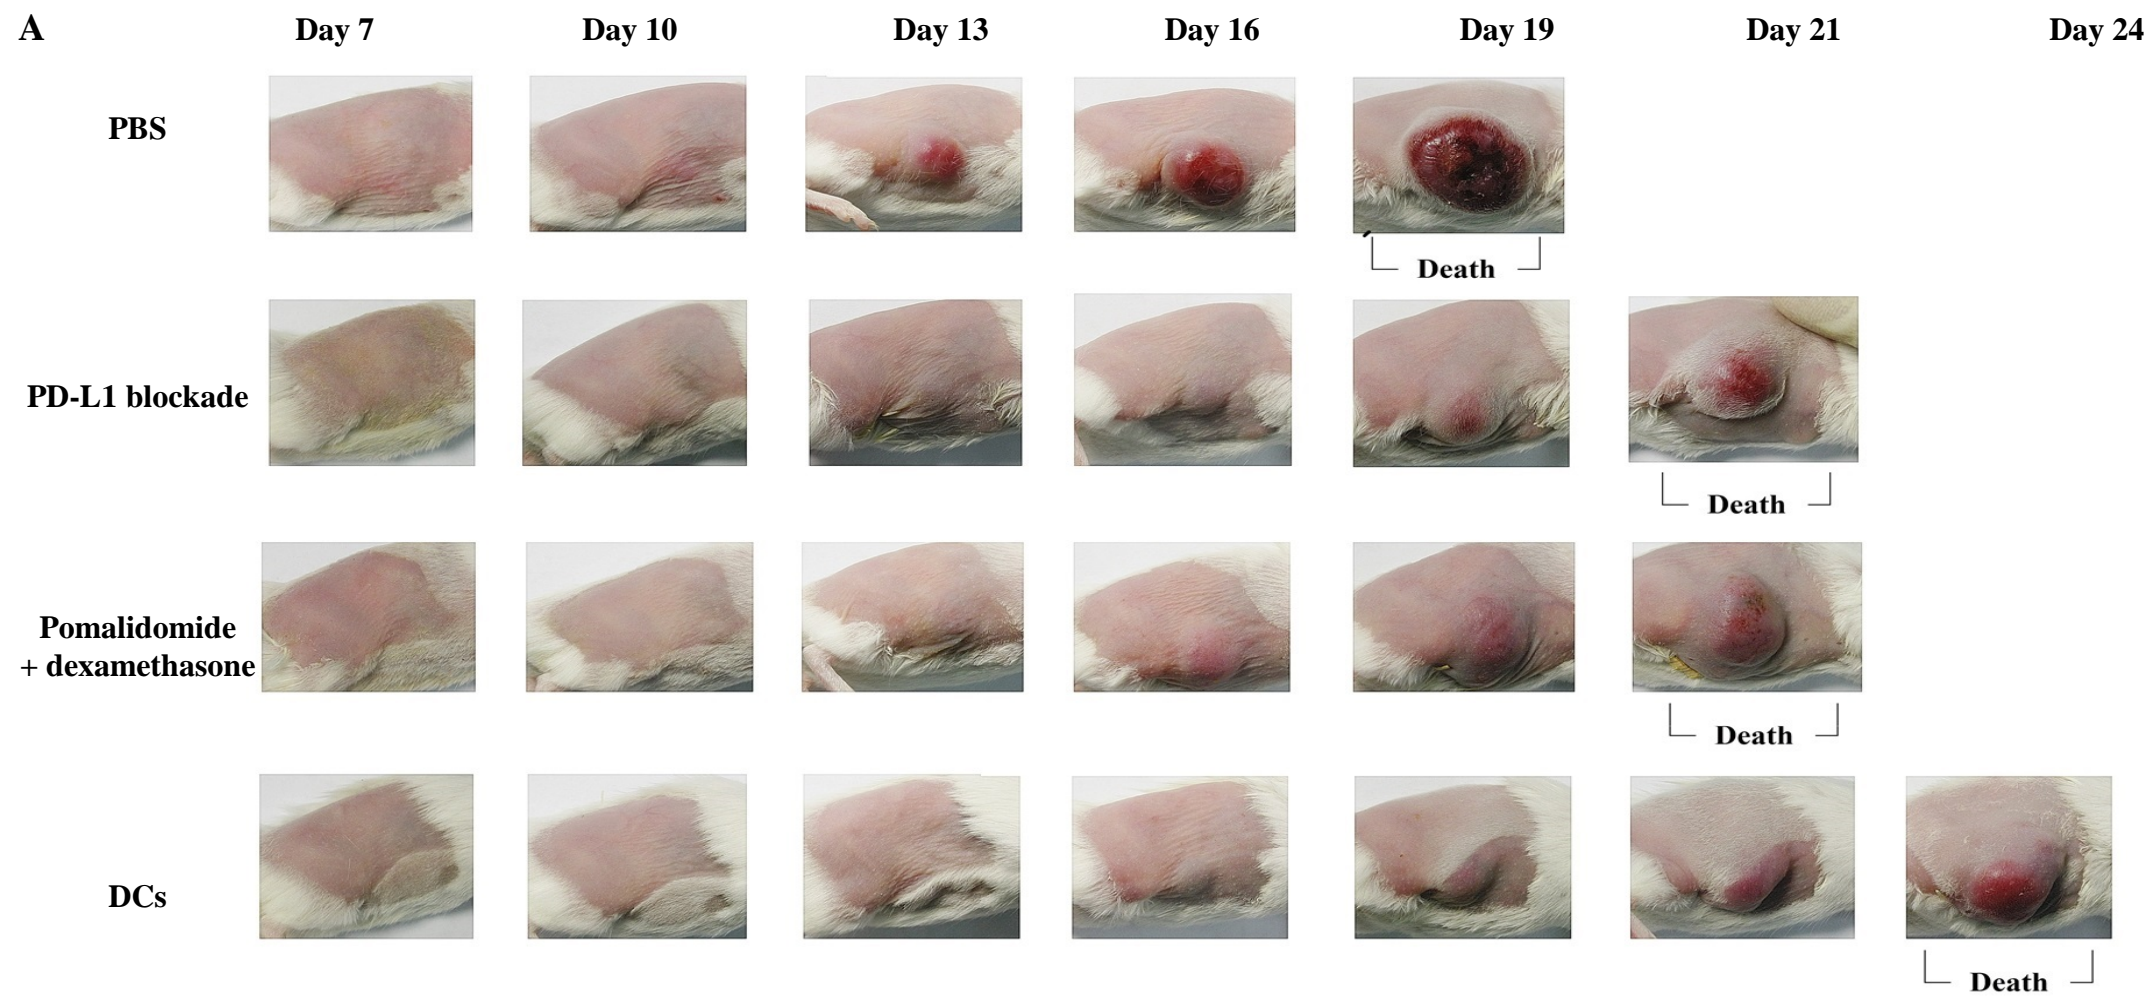

**B**

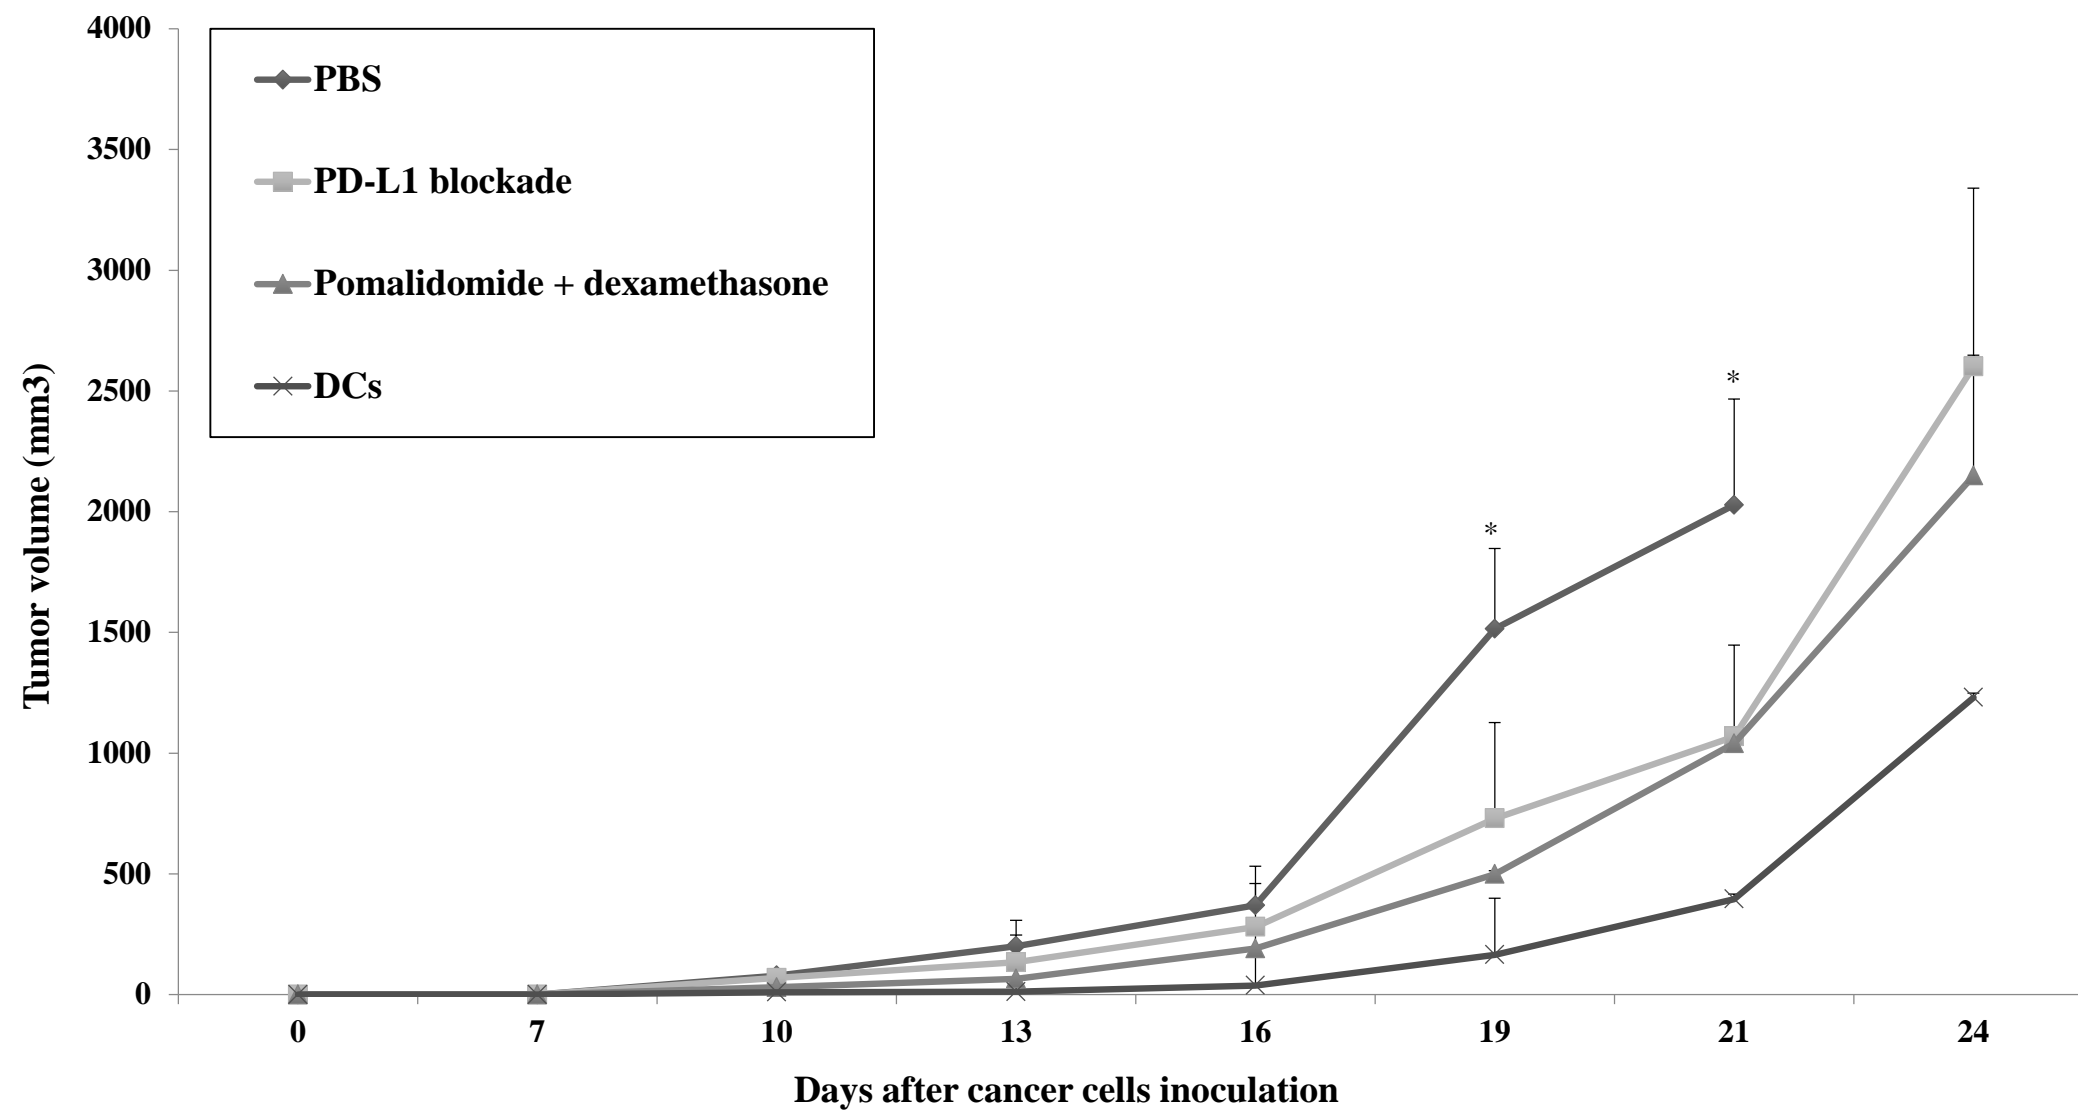

Supplement: 262_2020_2654_MOESM1_ESM.pdf [file 262_2020_2654_MOESM1_ESM.pdf]

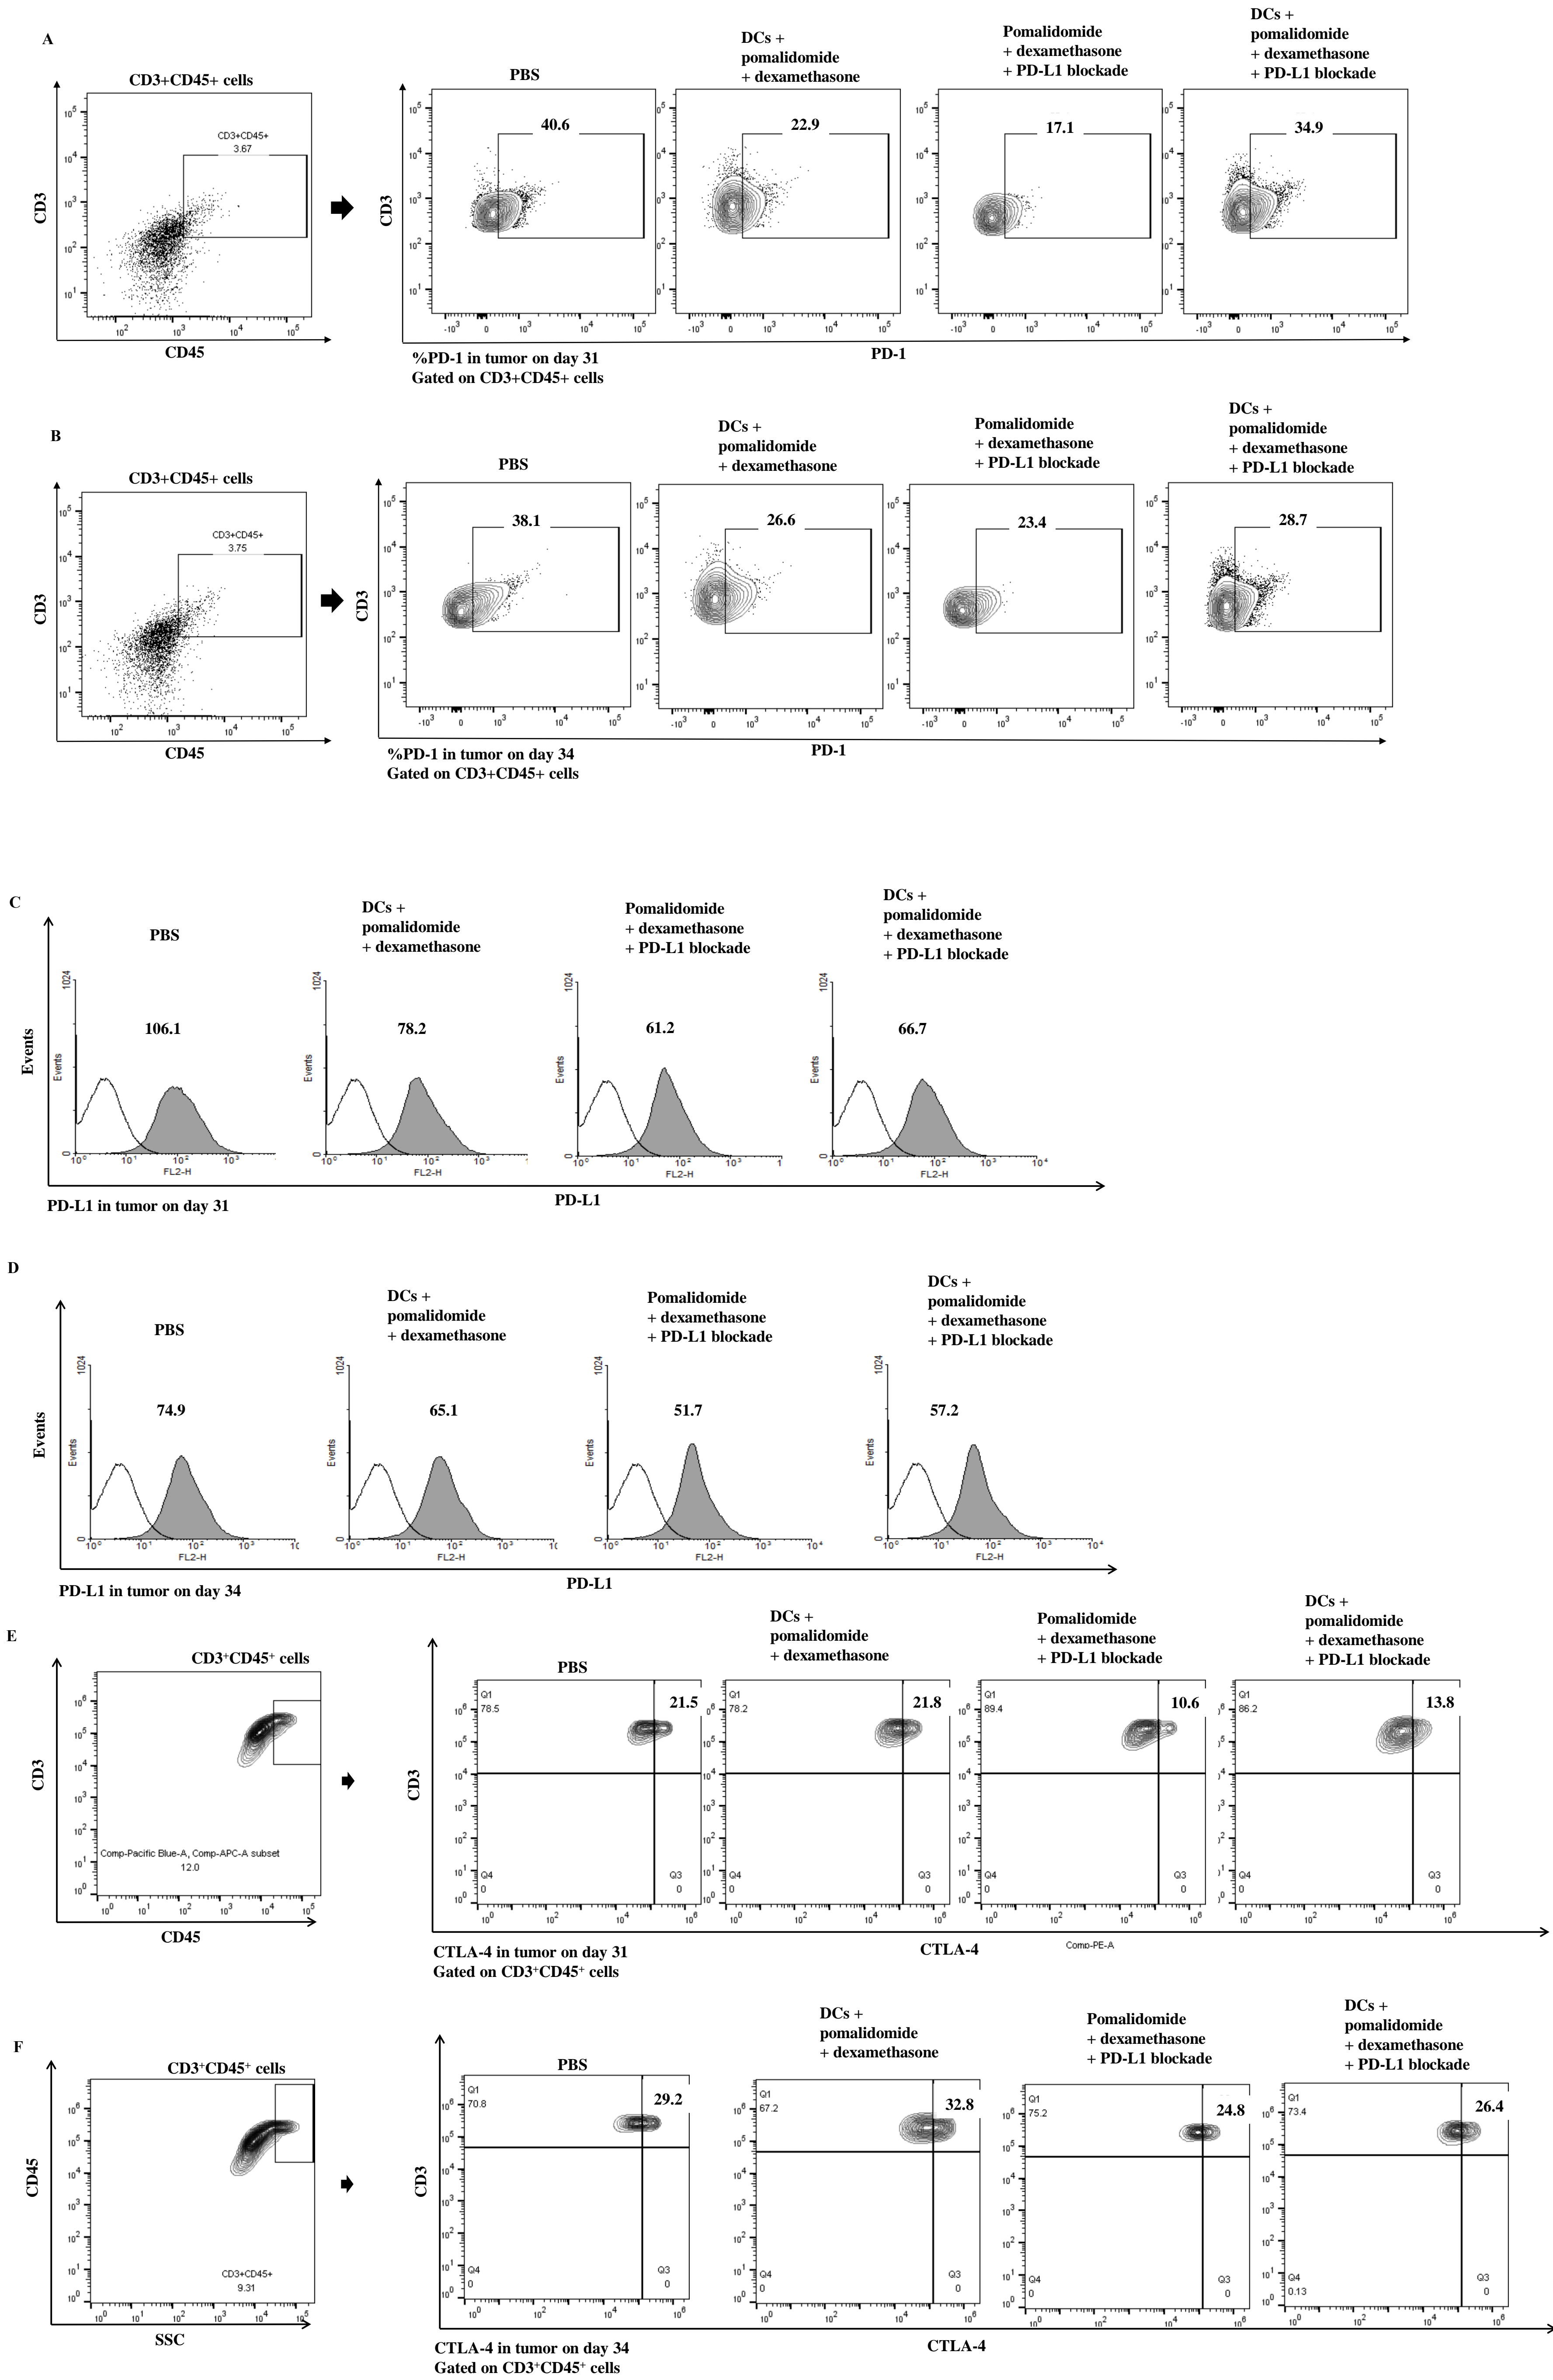

Supplement: 262_2020_2654_MOESM3_ESM.pdf [file 262_2020_2654_MOESM3_ESM.pdf]

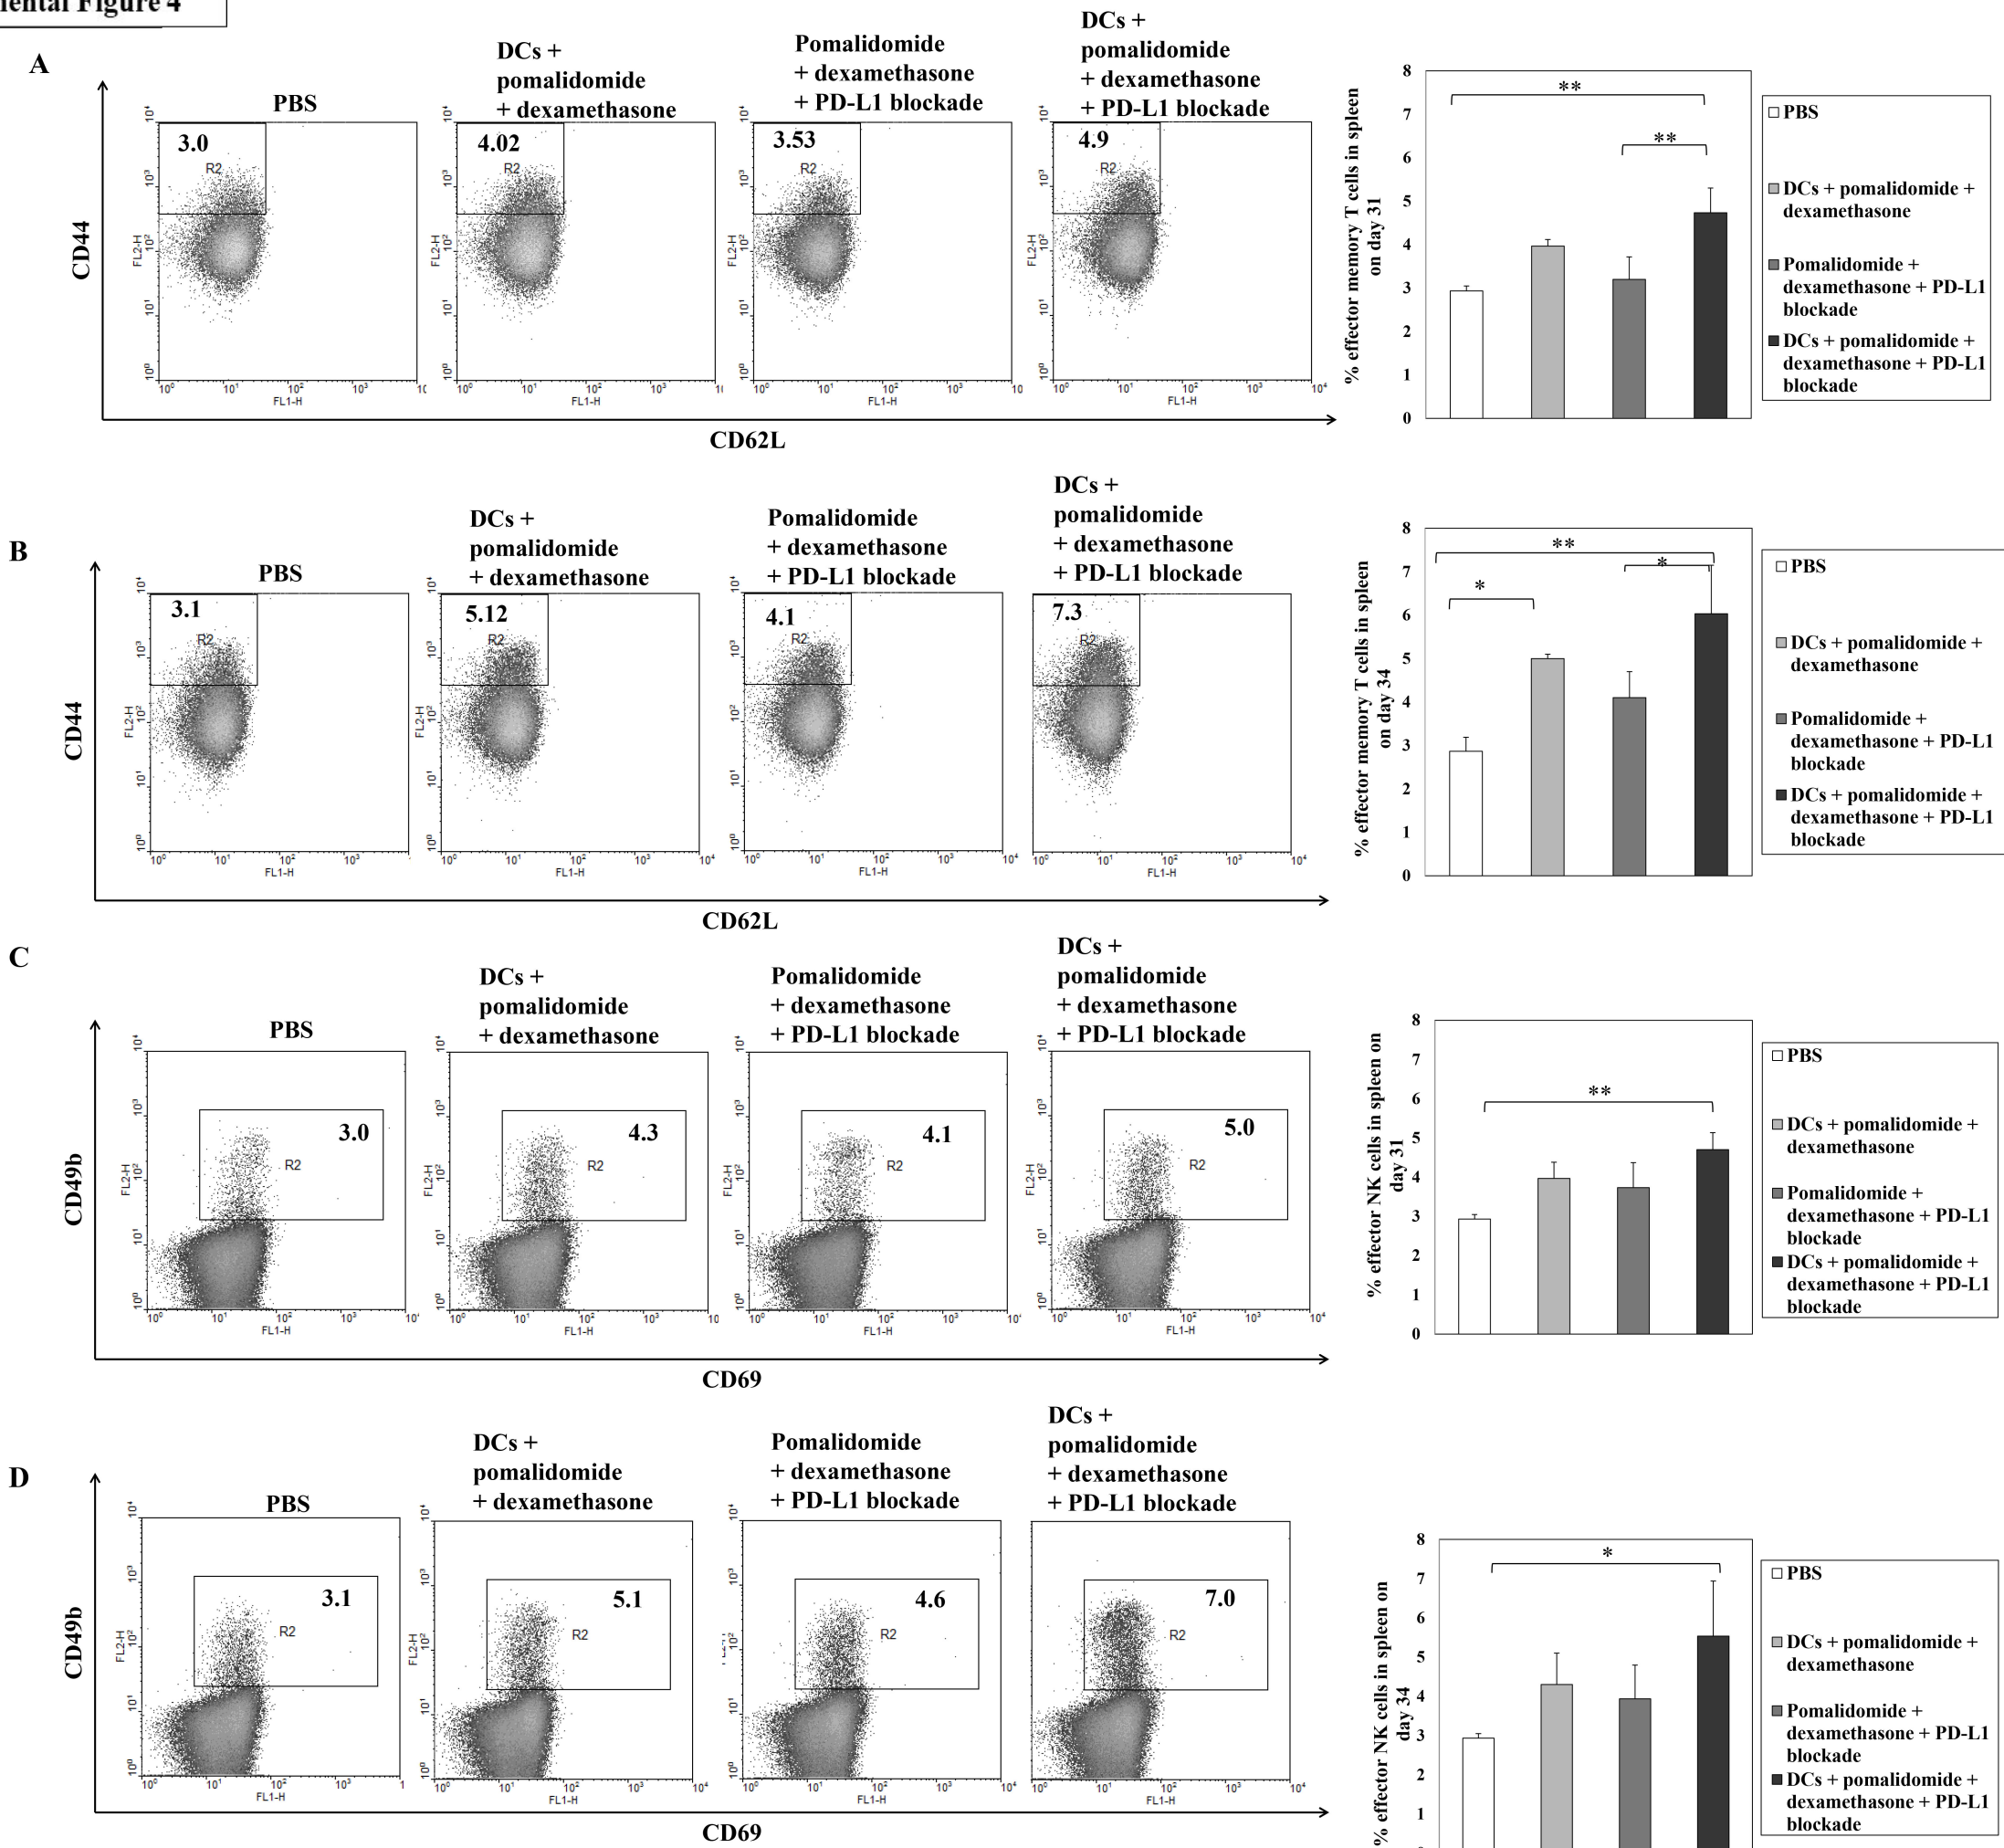

Supplement: 262_2020_2654_MOESM4_ESM.pdf [file 262_2020_2654_MOESM4_ESM.pdf]
